# Supplementary material
Source: Springer Nature journal article supplement (https://www.springermedizin.de/resource/supplementary/13075_2010_3223_MOESM5_ESM.pdf/9693950)

# Panel A: LOCF and Observed Changes from Baseline

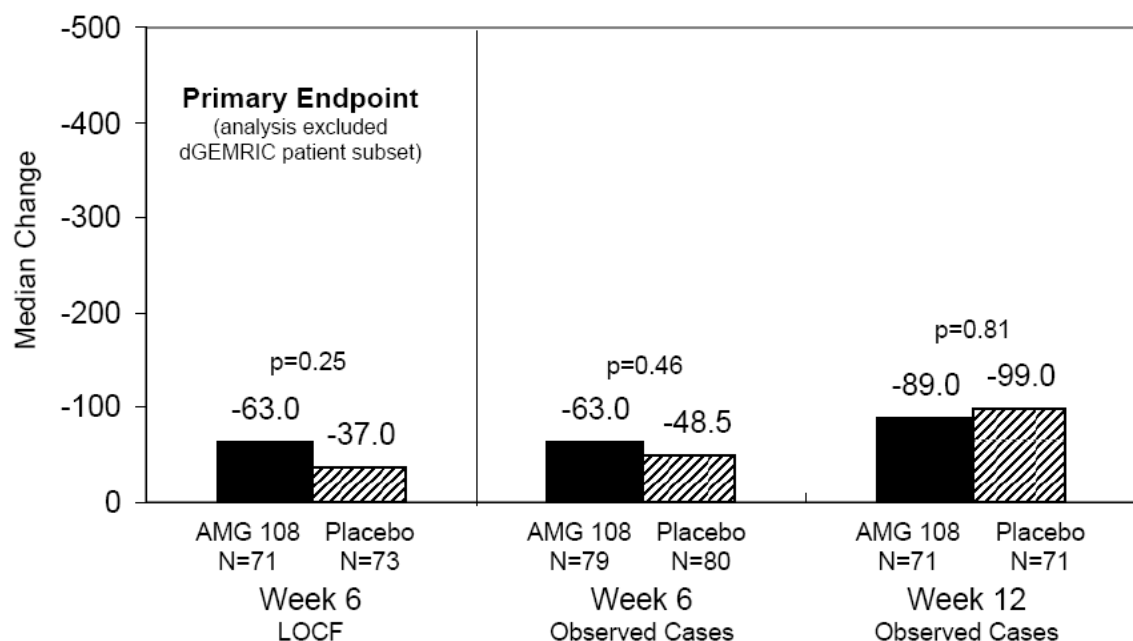

# Panel B: Change from Baseline, By Stratification for Pain at Baseline

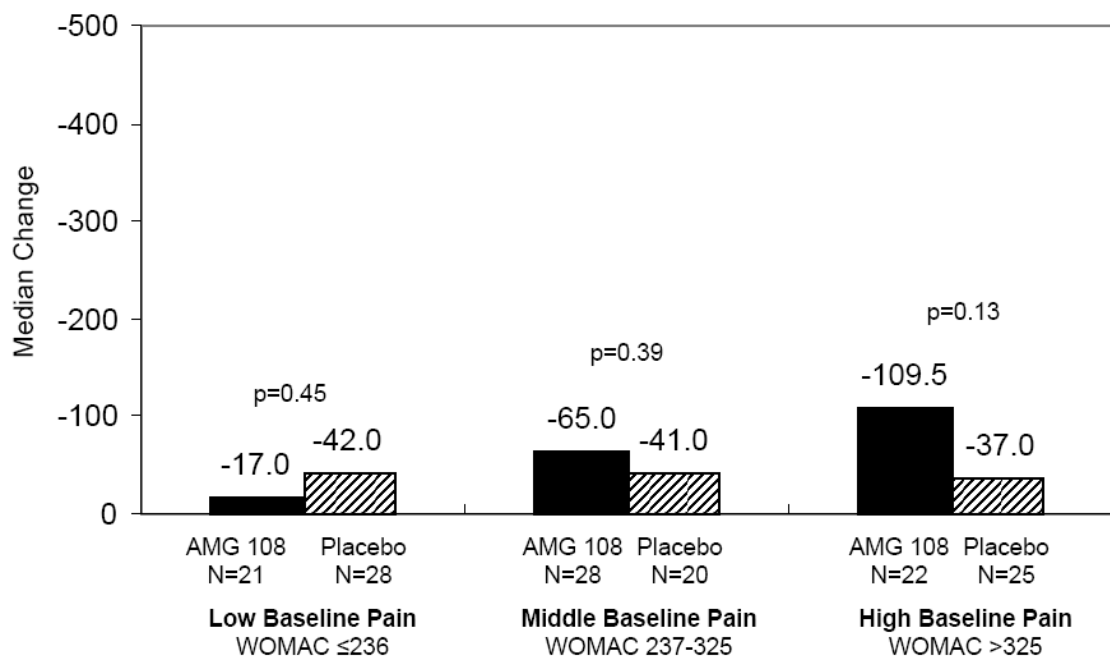

Supplement: MOESM5 [file 9693950]
